# Supplementary material for: Artificial intelligence for cellular phenotyping diagnosis of nasal polyps by whole-slide imaging
Source: PubMed Central journal article supplement — eBioMedicine. 2021 Apr 12;66:103336. doi: 10.1016/j.ebiom.2021.103336 (PMC8050855; doi:10.1016/j.ebiom.2021.103336), 2021-04-12
Supplement: mmc2.pdf [file mmc2.pdf]

### Confirmation

We add Prof. Haotin Lin (State Key Laboratory of Ophthalmology, Zhongshan Ophthalmic Center, Sun Yat-Sen University, Guangzhou 510060, China; Email: linht5@mail.sysu.edu.cn) as a co-author in our manuscript for his help for article revision guidance and suggestion. All the current authors agree with this authorship change.

| Name           | Signature      |           |
|----------------|----------------|-----------|
| Qingwu Wu      | Qingwu Wu      | 2021-3-12 |
| Jianning Chen  | Jianning Chen  | 2021-3-12 |
| Yong Ren       | Yong Ren       | 2021-3-12 |
| Huijun Qiu     | Huijun Qiu     | 2021-3-12 |
| Lianxiong Yuan | Lianxiong Yuan | 2021-3-12 |
| Huiyi Deng     | Huiyi Deng     | 2021-3-12 |
| Yana Zhang     | Yana Zhang     | 2021-3-12 |
| Rui Zheng      | Rui Zheng      | 2021-3-12 |
| Haiyu Hong     | Haiyu Hong     | 2021-3-12 |
| Yueqi Sun      | Yueqi Sun      | 2021-3-12 |
| Xinyue Wang    | Xinyue Wang    | 2021-3-11 |
| Xuekun Huang   | Xuekun Huang   | 2021-3-12 |
| Chunkui Shao   | Chunkui Shao   | 2021-3-11 |
| Lanqing Han    | Lanqing Han    | 2021-3-12 |
| Qintai Yang    | Qintai Yang    | 2021-3-12 |
